# Supplementary material for: Rise in incidence of opportunistic Candida keratitis in the post-COVID era.
Source: Research Square preprint supplement (doi:10.21203/rs.3.rs-8542099/v1), 2026-02-11
Supplement: Supplementary file 1 [file ae2b7c6f75e85433c3f32b8b.docx]

**Table1**

| Year | Total corneal scraping samples received | *Candida* spp. positive (KOH + CFW / Gram / Culture) (%) | KOH + CFW positive (%) | Gram stain positive (%) | Culture positive (%) |
| --- | --- | --- | --- | --- | --- |
| 2020 | 997 | 3 (0.3%) | 0 (0%) | 0 (0%) | 3 (0.3%) |
| 2021 | 1003 | 5 (0.5%) | 3 (0.3%) | 2 (0.2%) | 2 (0.2%) |
| 2022 | 1019 | 16 (1.6%) | 16 (1.5%) | 7 (0.7%) | 2 (0.2%) |
| 2023 | 1238 | 17 (1.4%) | 16 (1.3%) | 6 (0.5%) | 3 (0.2%) |
| 2024 | 1270 | 15 (1.2%) | 15 (1.2%) | 2 (0.2%) | 2 (0.2%) |
| 2025 | 767 | 7 (0.9%) | 5 (0.7%) | 0 (0%) | 2 (0.3%) |
